# Supplementary material
Source: publisher figshare collection journal article supplement (https://sage.figshare.com/ndownloader/files/32394507)
Supplement: Supplementary file 1 [file 32394507]

Supplementary Table 1. Search strategy used in the PubMed database

| **No.** | **Search item** |
| --- | --- |
| 1 | Neutropenia [MeSH term/ All fields] |
| 2 | white blood cell [MeSH term/ All fields] |
| 3 | leukocyte [MeSH term/ All fields] |
| 4 | leukopenia [MeSH term/ All fields] |
| 5 | leucopenia[MeSH term/ All fields] |
| 6 | Bone marrow suppression [MeSH term/ All fields] |
| 7 | 1 OR 2 OR 3 OR 4 OR 5 OR 6 |
| 8 | Breast cancer [MeSH term/ All fields] |
| 9 | Breast cancer |
| 10 | 8 OR 9 |
| 11 | Acupuncture [MeSH term/ All fields] |
| 12 | Moxibustion [MeSH term/ All fields] |
| 12 | acupoint stimulation [MeSH term/ All fields] |
| 13 | Acup* [MeSH term/ All fields] |
| 14 | 11 OR 12 OR 13 |
| 15 | 7 AND 10 AND 14 Filters: humans |

MeSH, Medical Subject Heading.
